# Supplementary material
Source: Springer Nature journal article supplement (https://www.springermedizin.de/resource/supplementary/12916_2012_781_MOESM6_ESM.pdf/9598304)

# Diagnostic window

Initiation phase

Effector phase

Lymphoid organs

PB

intestinal tract, liver, skin

d0

d5

d10

d15

d20

Symptoms

Tissue damage

Migration

Proliferation

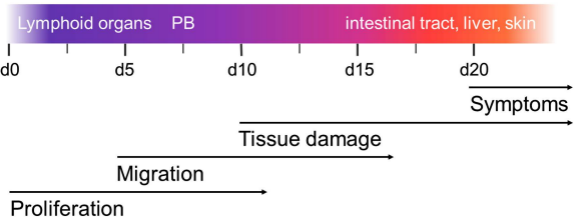

Supplement: MOESM6 [file 9598304]
